# Supplementary material
Source: PubMed Central journal article supplement (PMC3957900)
Supplement: AAC.01858-13_zac999102626so1.pdf [file AAC.01858-13_zac999102626so1.pdf]

**AAC1858-13**

**Antibiotic activity against naive and induced *Streptococcus pneumoniae*  
biofilms in an *in vitro* pharmacodynamic model**

Nathalie M. Vandeveldel, Paul M. Tulkens, Françoise Van Bambeke

Pharmacologie cellulaire et moléculaire, Louvain Drug Research Institute, Université  
catholique de Louvain, Brussels, Belgium

**SUPPLEMENTARY MATERIAL**

Figure S1

Concentration-response activity of clarithromycin against biofilms of ATCC 49619 (top) or R6 (bottom). Two-day- (open symbols) or 11-day- (closed symbols) old biofilms from the naive model (upper panels for each strain) or the induced model (lower panels for each strain) were incubated with increasing concentrations of clarithromycin for 24h. The ordinate shows the change in viability (measured by the decrease in resorufin fluorescence; left panels) or in biofilm mass (measured by the decrease in crystal violet absorbance; right panels) in percentage of the control value (no antibiotic present). All values are means  $\pm$  SEM of 4-10 independent experiments performed in quadruplicates (when not visible, the bars are smaller than the size of the symbols). The pertinent pharmacological descriptors of the curves are presented in Tables S1-S2.

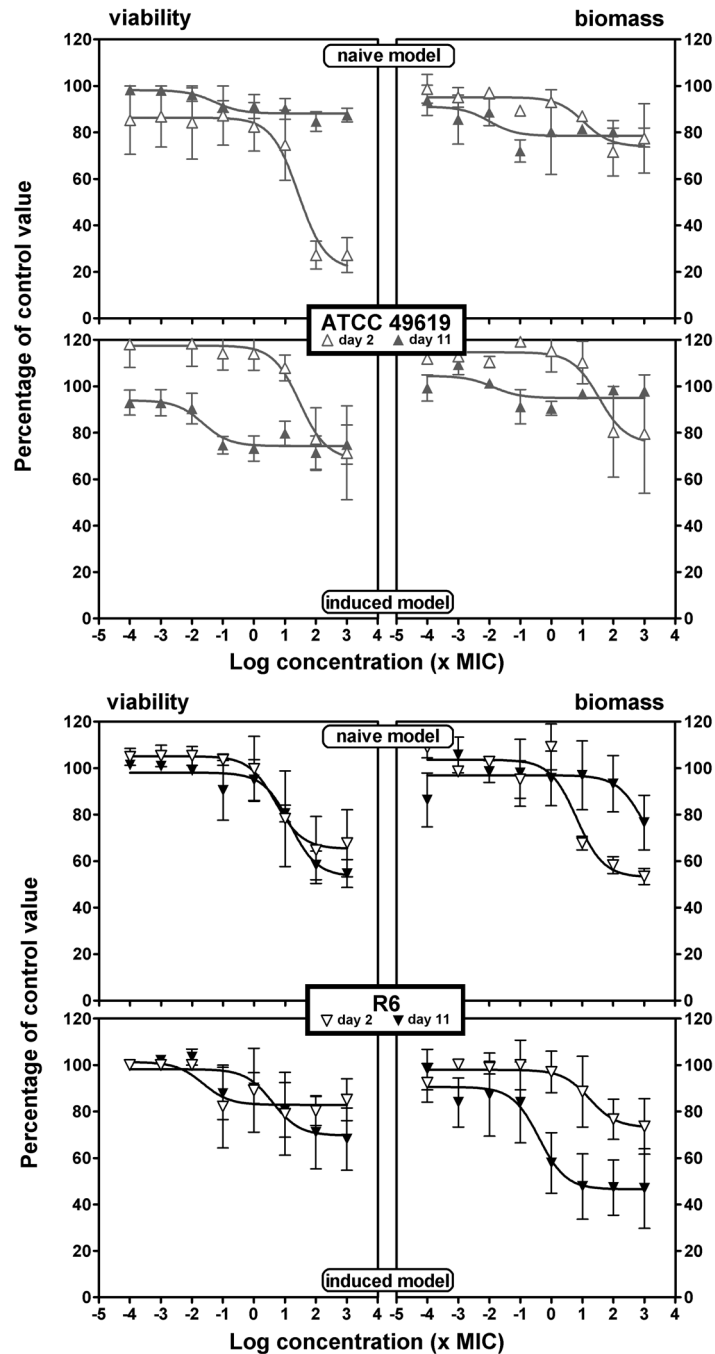

**Figure S2**

Concentration-response activity of levofloxacin against biofilms of ATCC 49619 (top) or R6 (bottom). Two-day- (open symbols) or 11-day- (closed symbols) old biofilms from the naive model (upper panels for each strain) or the induced model (lower panels for each strain) were incubated with increasing concentrations of levofloxacin for 24h. The ordinate shows the change in viability (measured by the decrease in resorufin fluorescence; left panels) or in biofilm mass (measured by the decrease in crystal violet absorbance; right panels) in percentage of the control value (no antibiotic present). All values are means  $\pm$  SEM of 4-10 independent experiments performed in quadruplicates (when not visible, the bars are smaller than the size of the symbols). The pertinent pharmacological descriptors of the curves are presented in Tables S1-S2.

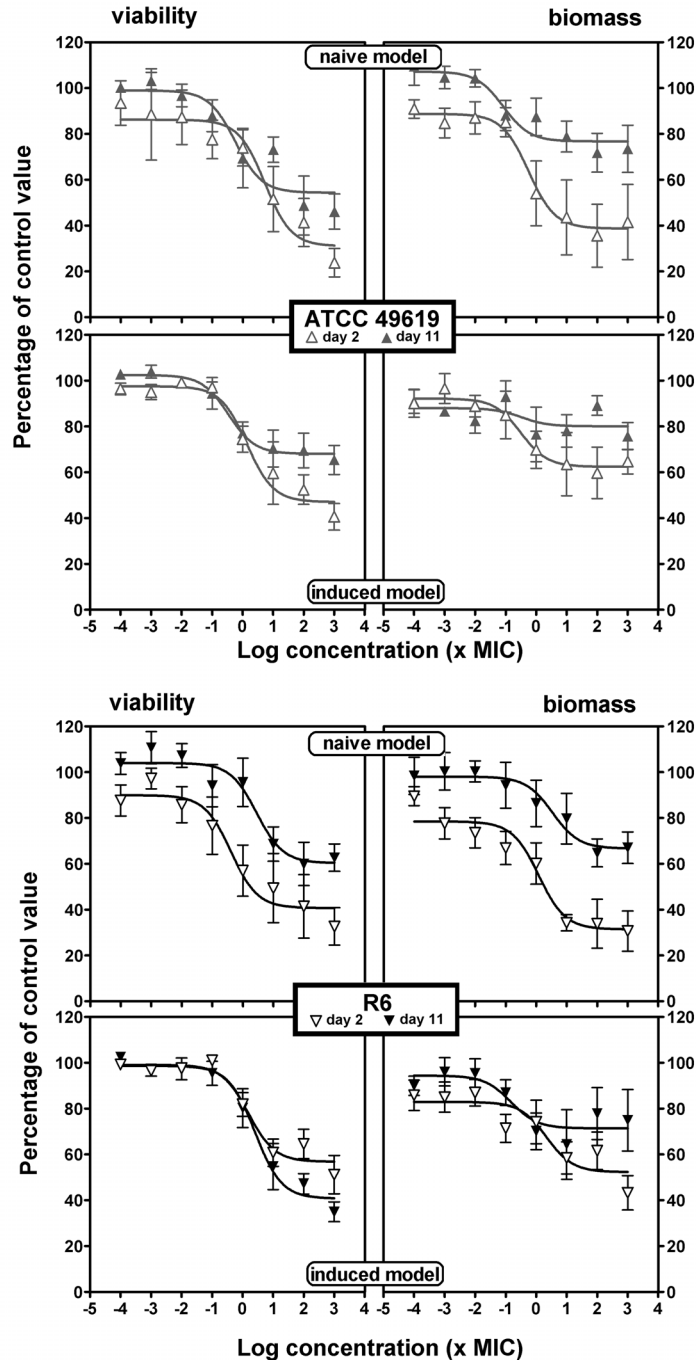

**Table S1. Pertinent regression parameters<sup>a</sup> (with 95% confidence intervals) and statistical analysis<sup>c</sup> for strain ATCC 49619**

| AB  | Biofilm model    | Effect on viability within the matrix                               |                                         |                            |                  |                                                                  | Effect on biofilm thickness             |                            |                   |                  |       |
|-----|------------------|---------------------------------------------------------------------|-----------------------------------------|----------------------------|------------------|------------------------------------------------------------------|-----------------------------------------|----------------------------|-------------------|------------------|-------|
|     |                  | E <sub>max</sub> <sup>b</sup><br>% loss of viability<br>(CI at 95%) | Concentration yielding specified effect |                            | R <sup>2</sup>   | E <sub>max</sub> <sup>b</sup><br>% loss of matrix<br>(CI at 95%) | Concentration yielding specified effect |                            | R <sup>2</sup>    |                  |       |
|     |                  |                                                                     | 20% reduction<br>(in X MIC)             | 50% reduction<br>(in mg/L) |                  |                                                                  | 20% reduction<br>(in X MIC)             | 50% reduction<br>(in mg/L) |                   |                  |       |
| AMX | 2 days; naive    | 68.89 (51.80 to 85.98) / A <sup>c</sup>                             | 16.5 (9.7 to 23.5) / A <sup>c</sup>     | 1.1                        | 111.3            | 0.648                                                            | 50.13 (40.71 to 59.55) / A              | 0.1 (-11.8 to 12) / A      | < 0.1             | 101.3            | 0.430 |
|     | 2 days; induced  | 40.21 (26.96 to 53.46) / B                                          | 7.6 (-3.4 to 22.5) / A                  | 0.5                        | >10 <sup>4</sup> | 0.589                                                            | 45.83 (29.74 to 61.92) / A              | 0.2 (-27.8 to 29) / A      | < 0.1             | >10 <sup>4</sup> | 0.413 |
|     | 11 days; naive   | 35.01 (25.31 to 44.71) / B                                          | 0.9 (12.23 to 14.43) / B                | 0.1                        | >10 <sup>4</sup> | 0.500                                                            | 25.56 (11.78 to 39.34) / B              | 35.8 (-2.8 to 74.4) / B    | 2.3               | >10 <sup>4</sup> | 0.206 |
|     | 11 days; induced | 37.17 (29.57 to 44.77) / B                                          | 0.5 (-12.23 to 13.23) / B               | 0.1                        | >10 <sup>4</sup> | 0.626                                                            | 6.72 (-0.78 to 14.22) / C               | > 10 <sup>4</sup> / C      | > 640             | >10 <sup>4</sup> | 0.147 |
| CLR | 2 days; naive    | 79.01 (67.91 to 90.11) / A                                          | 2.9 (-20.1 to 26.13) / A                | < 0.1                      | 33.5             | 0.648                                                            | 26.08 (14.72 to 37.44) / A              | 28.2 (-14.4 to 70.8) / A   | 60.9              | >10 <sup>4</sup> | 0.396 |
|     | 2 days; induced  | 31.46 (21.04 to 41.88) / B                                          | 98.6 (70.6 to 124.9) / B                | 3.2                        | >10 <sup>4</sup> | 0.552                                                            | 24.59 (1.54 to 47.64) / A               | 260 (88.2 to 431.2) / B    | 8.3               | >10 <sup>4</sup> | 0.553 |
|     | 11 days; naive   | 11.87 (10.27 to 13.47) / C                                          | > 10 <sup>4</sup> / C                   | > 320                      | >10 <sup>4</sup> | 0.427                                                            | 21.50 (13.76 to 29.24) / A              | 0.1 / C                    | < 0.1             | >10 <sup>4</sup> | 0.137 |
|     | 11 days; induced | 25.74 (22.9 to 28.58) / B                                           | 0.06 (-33.5 to 33.5) / A                | < 0.1                      | >10 <sup>4</sup> | 0.367                                                            | 5.00 (0.47 to 9.53) / B                 | > 10 <sup>4</sup> / C      | > 320             | >10 <sup>4</sup> | 0.325 |
| SOL | 2 days; naive    | 63.03 (50.63 to 75.43) / A                                          | 3.5 (-15.25 to 21.4) / A                | < 0.1                      | 9.2              | 0.746                                                            | 63.88 (56.51 to 71.25) / A              | 0.1 (-4 to 4.3) / A        | < 0.1             | 0.4              | 0.718 |
|     | 2 days; induced  | 21.86 (12.71 to 31.01) / B                                          | 192.5 (170.3 to 220) / B                | - 1.5                      | >10 <sup>4</sup> | 0.499                                                            | 59.48 (50.78 to 68.18) / A              | 0.1 (-15.7 to 15.7) / A    | < 0.1             | 1.4              | 0.634 |
|     | 11 days; naive   | 36.4 (25.56 to 47.24) / C                                           | 17.7 (9.3 to 34.9) / C                  | - 0.1                      | >10 <sup>4</sup> | 0.491                                                            | 34.26 (15.41 to 53.11) / B              | 58.6 (33.9 to 83.3) / B    | 0.5               | >10 <sup>4</sup> | 0.277 |
|     | 11 days; induced | 35.74 (31.20 to 40.28) / C                                          | 0.6 (-5 to 6.3) / A                     | < 0.1                      | >10 <sup>4</sup> | 0.733                                                            | 11.64 (0.36 to 22.52) / C               | > 10 <sup>4</sup> / C      | > 80              | >10 <sup>4</sup> | 0.050 |
| LVX | 2 days; naive    | 69.06 (51.60 to 86.52) / A                                          | 0.7 (-14.8 to 16.1) / A                 | 0.7                        | 10.0             | 0.434                                                            | 61.22 (47.73 to 74.71) / A              | 0.1 (-11.5 to 11.7) / A    | 0.1               | 2.0              | 0.408 |
|     | 2 days; induced  | 52.90 (46.22 to 59.58) / B                                          | 0.7 (-4 to 5.4) / A                     | 0.7                        | 21.6             | 0.829                                                            | 37.56 (27.42 to 47.70) / B              | 0.2 (21.4 to 21.7) / A     | 0.2               | >10 <sup>4</sup> | 0.334 |
|     | 11 days; naive   | 45.63 (35.23 to 56.03) / B                                          | 0.4 (-10.4 to 11.2) / A                 | 0.4                        | >10 <sup>4</sup> | 0.495                                                            | 23.23 (15.46 to 31.00) / C              | 0.7 (-16.5 to 18) / A      | 0.7               | >10 <sup>4</sup> | 0.378 |
|     | 11 days; induced | 31.92 (25.59 to 38.25) / C                                          | 0.7 (-7.8 to 9.2) / A                   | 0.7                        | >10 <sup>4</sup> | 0.598                                                            | 19.93 (11.86 to 28.00) / C              | > 10 <sup>4</sup> / B      | > 10 <sup>4</sup> | >10 <sup>4</sup> | 0.073 |
| MXF | 2 days; naive    | 74.07 (69.76 to 78.38) / A                                          | 0.1 (-6 to 6.3) / A                     | < 0.1                      | 0.1              | 0.569                                                            | 81.25 (70.63 to 91.87) / A              | NA <sup>d</sup>            | NA <sup>d</sup>   | 0.1              | 0.620 |
|     | 2 days; induced  | 64.62 (58.22 to 71) / A                                             | 1.0 (-5 to 7.2) / A                     | 0.1                        | 5.9              | 0.765                                                            | 73.19 (63.55 to 82.83) / A              | NA <sup>d</sup>            | NA <sup>d</sup>   | 0.9              | 0.655 |
|     | 11 days; naive   | 42.18 (39.19 to 45.17) / B                                          | 1.3 (-4.2 to 7) / A                     | 0.2                        | >10 <sup>4</sup> | 0.801                                                            | 20.87 (13.59 to 28.15) / B              | 3.9 (-17.2 to 25) / A      | 0.5               | >10 <sup>4</sup> | 0.454 |
|     | 11 days; induced | 45.14 (41.85 to 48.42) / B                                          | 4.7 (-0.47 to 10) / A                   | 0.6                        | >10 <sup>4</sup> | 0.847                                                            | 17.21 (10.37 to 24.05) / B              | > 10 <sup>4</sup> / B      | > 1250            | >10 <sup>4</sup> | 0.193 |

<sup>a</sup> Calculated based on sigmoidal regressions with a Hill coefficient of 1

<sup>b</sup> Decrease in viability and matrix thickness from the original values obtained under control conditions (growth without antibiotic) as extrapolated for an infinitely large concentration of antibiotic (means with 95% confidence intervals).

<sup>c</sup> Statistical analysis: One-way ANOVA with Tukey post test for multiple comparisons between different types of biofilms for each drug, values with different letters are significantly different from each other (P<0.05); see figures 6 and 7 for comparisons between antibiotics for each type of biofilm.

<sup>d</sup> not applicable (TOP of the Hill equation close to 80%)

**Table S2. Pertinent regression parameters<sup>a</sup> (with 95% confidence intervals) and statistical analysis<sup>c</sup> for strain R6**

| AB  | Biofilm model    | Effect on viability within the matrix                              |                                         |           |                  |                                                                  | Effect on biofilm thickness             |                             |                 |                  |                             |
|-----|------------------|--------------------------------------------------------------------|-----------------------------------------|-----------|------------------|------------------------------------------------------------------|-----------------------------------------|-----------------------------|-----------------|------------------|-----------------------------|
|     |                  | E <sub>max</sub> <sup>b</sup><br>% loss of viability<br>(I at 95%) | Concentration yielding specified effect |           | R <sup>2</sup>   | E <sub>max</sub> <sup>b</sup><br>% loss of matrix<br>(CI at 95%) | Concentration yielding specified effect |                             | R <sup>2</sup>  |                  |                             |
|     |                  |                                                                    | 20% reduction<br>(in X MIC)             | (in mg/L) |                  |                                                                  | 50% reduction<br>(in X MIC)             | 20% reduction<br>(in X MIC) |                 | (in mg/L)        | 50% reduction<br>(in X MIC) |
| AMX | 2 days; naive    | 71.60 (57.16 to 86.04) / A <sup>c</sup>                            | 11.1 (3.6 to 17.5) / A <sup>c</sup>     | 0.4       | 79.08            | 0.748                                                            | 41.45 (29.26 to 53.64) / A              | 1.6 (-27 to 30.2) / A       | 0.1             | >10 <sup>4</sup> | 0.294                       |
|     | 2 days; induced  | 41.11 (21.52 to 60.70) / B                                         | 1.1 (70.1 to 72.3) / A                  | 0.1       | >10 <sup>4</sup> | 0.258                                                            | 35.41 (22.70 to 48.12) / A              | 0.6 (39.4 to 31.1) / A      | < 0.1           | >10 <sup>4</sup> | 0.417                       |
|     | 11 days; naive   | 21.3 (12.38 to 30.22) / B                                          | 48.3 (4.1 to 92.4) / B                  | 1.5       | >10 <sup>4</sup> | 0.298                                                            | 25.36 (18.23 to 32.49) / B              | 0.4 (-88.2 to 89) / A       | < 0.1           | >10 <sup>4</sup> | 0.189                       |
|     | 11 days; induced | 31.04 (21.62 to 40.46) / B                                         | 3.5 (-23.9 to 36.3) / A                 | 0.1       | >10 <sup>4</sup> | 0.589                                                            | 24.24 (18.81 to 29.67) / B              | > 10 <sup>4</sup> / B       | > 320           | >10 <sup>4</sup> | 0.826                       |
| CLR | 2 days; naive    | 34.75 (26.87 to 42.63) / A                                         | 8.5 (-21.9 to 39) / A                   | 0.1       | >10 <sup>4</sup> | 0.503                                                            | 46.03 (38.48 to 53.58) / A              | 5.9 (-4.7 to 16.9) / A      | 0.4             | >10 <sup>4</sup> | 0.881                       |
|     | 2 days; induced  | 17.82 (11.26 to 24.38) / B                                         | > 10 <sup>4</sup> / B                   | > 640     | >10 <sup>4</sup> | 0.472                                                            | 26.84 (11.01 to 42.67) / B              | 44.0 (-16.8 to 104.6) / B   | 2.8             | >10 <sup>4</sup> | 0.332                       |
|     | 11 days; naive   | 46.59 (41.35 to 51.83) / A                                         | 9.9 (-2.2 to 22.8) / A                  | 0.6       | >10 <sup>4</sup> | 0.767                                                            | 44.59 (-304.62 to 393.80) / A           | 715.1 / C                   | 45.6            | >10 <sup>4</sup> | 0.132                       |
|     | 11 days; induced | 30.34 (23.63 to 37) / A,B                                          | 7.1 (-39.3 to 53.6) / A                 | 0.5       | >10 <sup>4</sup> | 0.411                                                            | 53.50 (37.71 to 62.29) / A              | 0.1 (-43.4 to 43.6) / A     | < 0.1           | 1.17             | 0.478                       |
| SOL | 2 days; naive    | 47.29 (33.04 to 61.54) / A                                         | 33.8 (27.5 to 46.8) / A                 | 0.1       | >10 <sup>4</sup> | 0.572                                                            | 55.40 (-127.4 to 171.8) / A,B           | NA <sup>d</sup>             | NA <sup>d</sup> | 5307.13          | 0.043                       |
|     | 2 days; induced  | 24.78 (41.50 to 8.06) / B                                          | 29.8 (-119.6 to 178.6) / A              | 0.1       | >10 <sup>4</sup> | 0.105                                                            | 28.38 (21.27 to 35.5) / A               | 0.9 (0.5 to 2.3) / A        | < 0.1           | >10 <sup>4</sup> | 0.099                       |
|     | 11 days; naive   | 34.26 (15.41 to 53.11) / A                                         | 59.8 (33 to 84.4) / A                   | 0.2       | >10 <sup>4</sup> | 0.277                                                            | 12.93 (7.92 to 17.94) / B               | > 10 <sup>4</sup> / B       | > 40            | >10 <sup>4</sup> | 0.042                       |
|     | 11 days; induced | 45.18 (34.74 to 55.62) / A                                         | 24.6 (18.6 to 33.6) / A                 | 0.1       | >10 <sup>4</sup> | 0.688                                                            | 14.84 (10.77 to 18.91) / B              | > 10 <sup>4</sup> / B       | > 40            | >10 <sup>4</sup> | 0.052                       |
| LVX | 2 days; naive    | 59.24 (45.59 to 72.89) / A                                         | 0.1 (-9.8 to 10) / A                    | 0.1       | 1.77             | 0.371                                                            | 68.52 (62.93 to 74.1) / A               | NA <sup>d</sup>             | NA <sup>d</sup> | 1.86             | 0.511                       |
|     | 2 days; induced  | 43.21 (36.62 to 49.80) / B                                         | 1.3 (-6 to 8.6) / A                     | 0.7       | >10 <sup>4</sup> | 0.800                                                            | 47.72 (42.2 to 53.24) / B               | 0.2 (-17.1 to 17.5) / A     | 0.1             | >10 <sup>4</sup> | 0.306                       |
|     | 11 days; naive   | 39.64 (28.75 to 50.53) / B                                         | 3.5 (-6.1 to 13.9) / A                  | 1.8       | >10 <sup>4</sup> | 0.530                                                            | 33.28 (27.37 to 39.2) / C               | 4.6 (-6.1 to 13.9) / A      | 2.3             | >10 <sup>4</sup> | 0.328                       |
|     | 11 days; induced | 59.21 (51.05 to 67.37) / A                                         | 1.2 (-4.9 to 7.3) / A                   | 0.6       | 13.49            | 0.808                                                            | 28.63 (23.58 to 33.68) / C              | 0.3 (-63.3 to 63.9) / A     | 0.2             | >10 <sup>4</sup> | 0.212                       |
| MXF | 2 days; naive    | 81.18 (68.82 to 95.54) / A                                         | 0.3 (-7.5 to 7.9) / A                   | < 0.1     | 2.56             | 0.694                                                            | 59.06 (48.27 to 69.85) / A              | NA <sup>d</sup>             | NA <sup>d</sup> | 1.78             | 0.513                       |
|     | 2 days; induced  | 47.73 (32.28 to 63.18) / B                                         | 7.9 (-1.9 to 20.1) / A                  | 0.5       | >10 <sup>4</sup> | 0.638                                                            | 47.88 (32.02 to 63.74) / A              | 14.5 (2.9 to 29.9) / A      | 0.5             | >10 <sup>4</sup> | 0.609                       |
|     | 11 days; naive   | 30.82 (18.16 to 43.48) / C                                         | 14.9 (0.7 to 29) / A                    | 1.0       | >10 <sup>4</sup> | 0.435                                                            | 23.67 (17.95 to 29.39) / B              | 5.2 (-12.5 to 22.9) / A     | 0.3             | >10 <sup>4</sup> | 0.365                       |
|     | 11 days; induced | 48.73 (37.21 to 60.25) / B                                         | 4.8 (-3.3 to 13.3) / A                  | 0.3       | >10 <sup>4</sup> | 0.636                                                            | 9.66 (5.64 to 13.68) / C                | > 10 <sup>4</sup> / B       | > 640           | >10 <sup>4</sup> | 0.282                       |

<sup>a</sup> Calculated based on sigmoidal regressions with a Hill coefficient of 1

<sup>b</sup> Decrease in viability and matrix thickness from the original values obtained under control conditions (growth without antibiotic) as extrapolated for an infinitely large concentration of antibiotic (means with 95% confidence intervals).

<sup>c</sup> Statistical analysis: One-way ANOVA with Tukey post test for multiple comparisons between different types of biofilms for each drug, values with different letters are significantly different from each other (P<0.05); see figures 6 and 7 for comparisons between antibiotics for each type of biofilm.

<sup>d</sup> not applicable (TOP of the hill equation close to 80 %)
